# Supplementary material
Source: PubMed Central journal article supplement (PMC3422570)

# Supplementary Figure 1

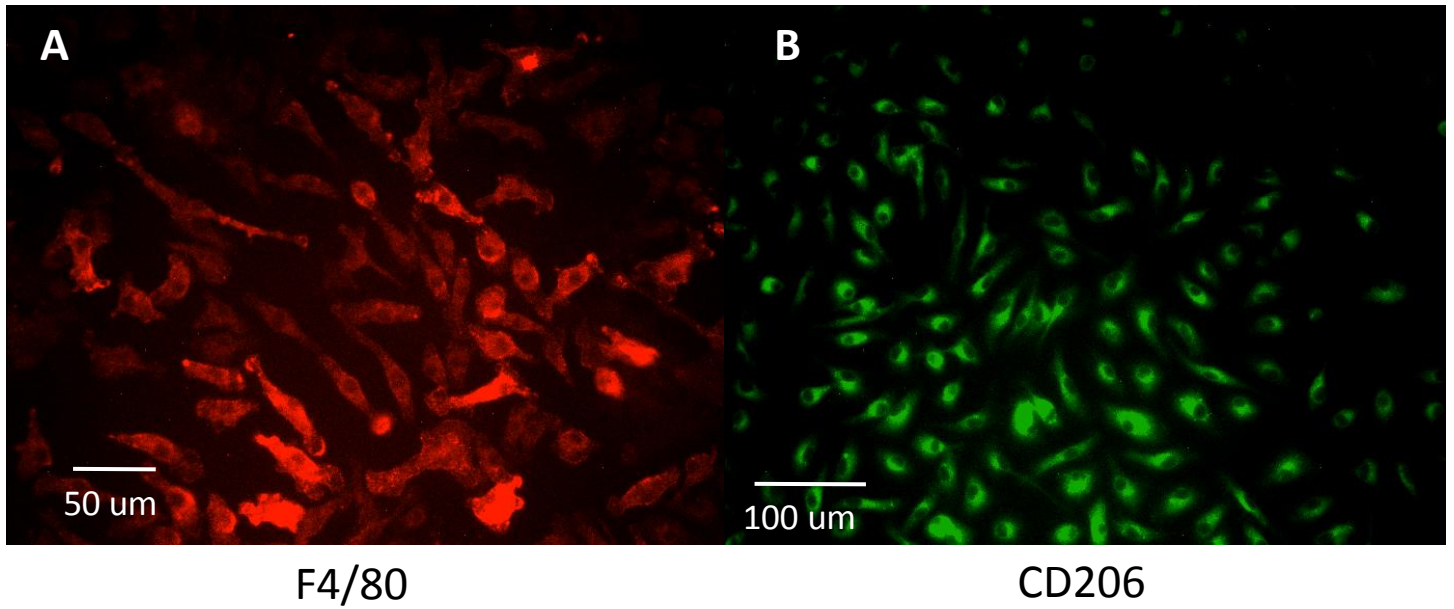

## Supplementary Figure 2

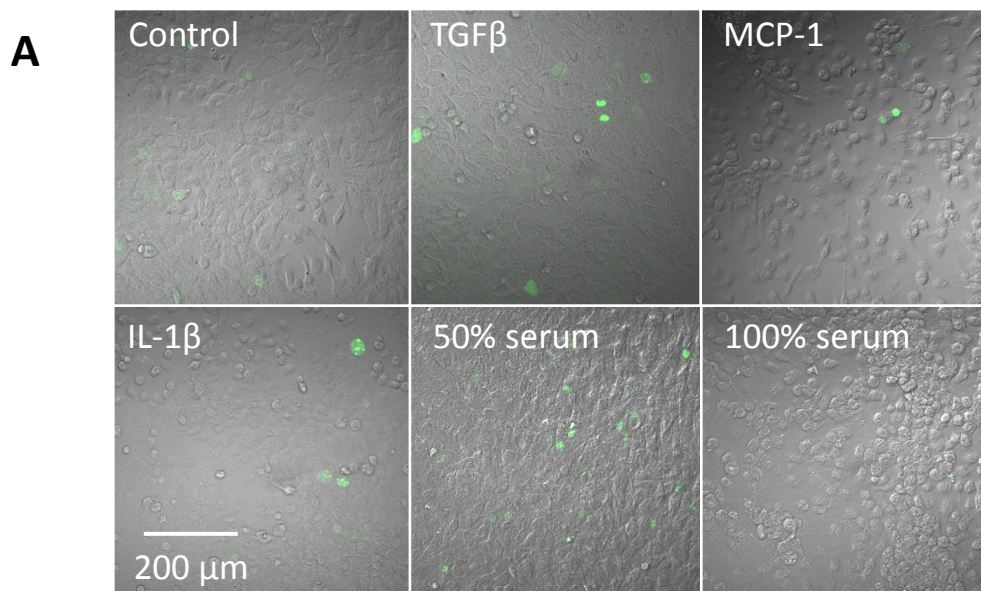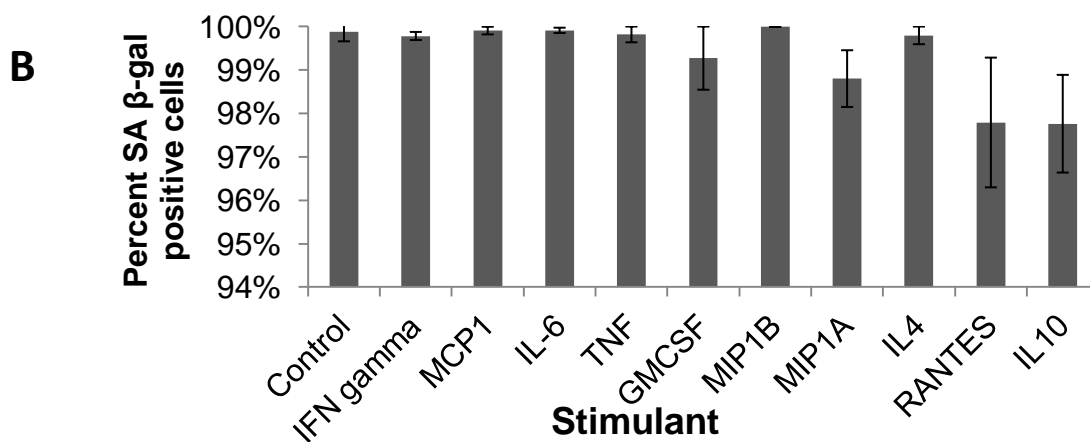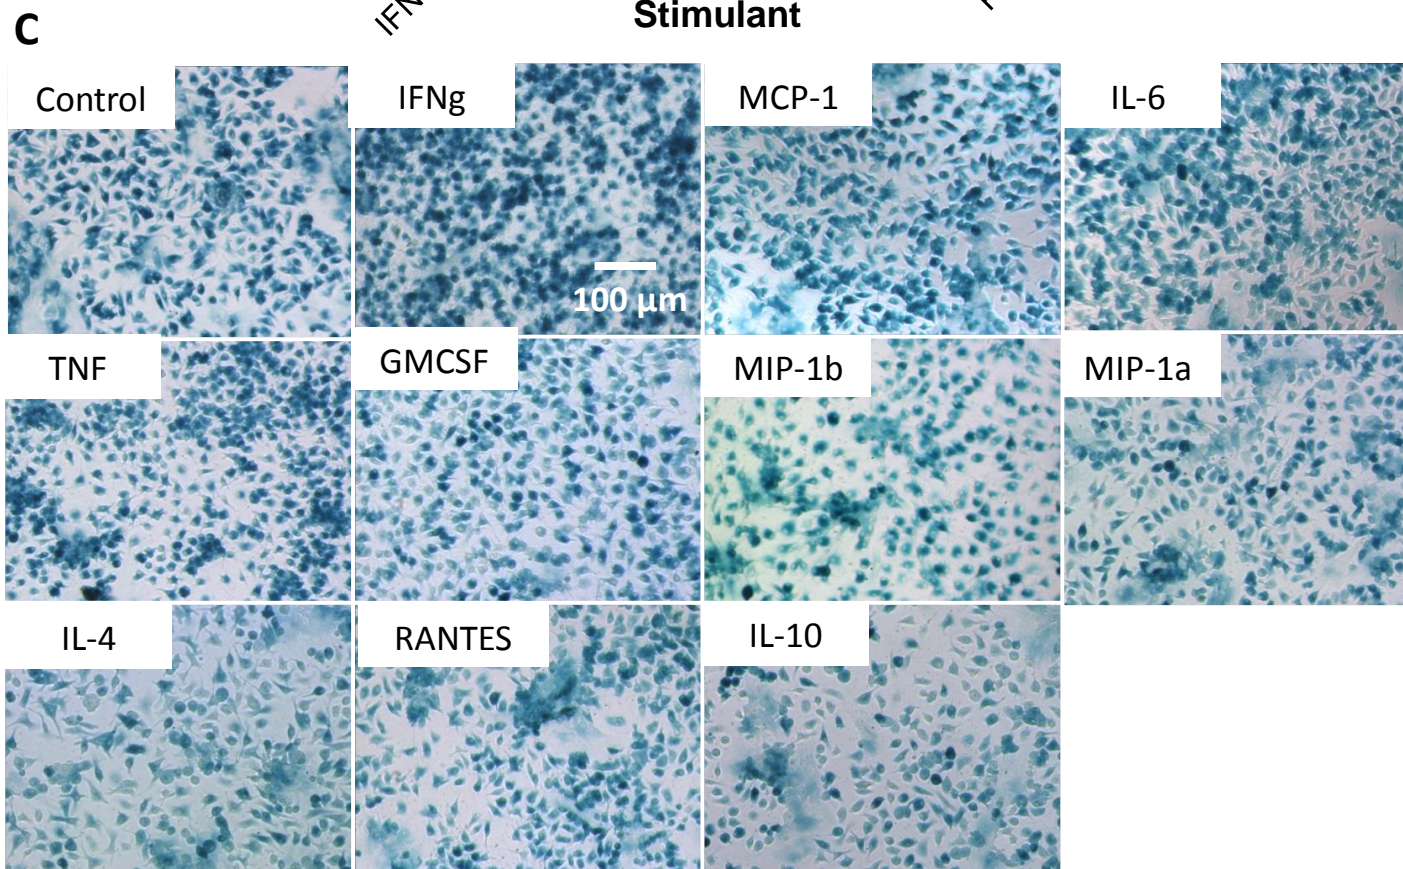

# Supplementary Figure 3

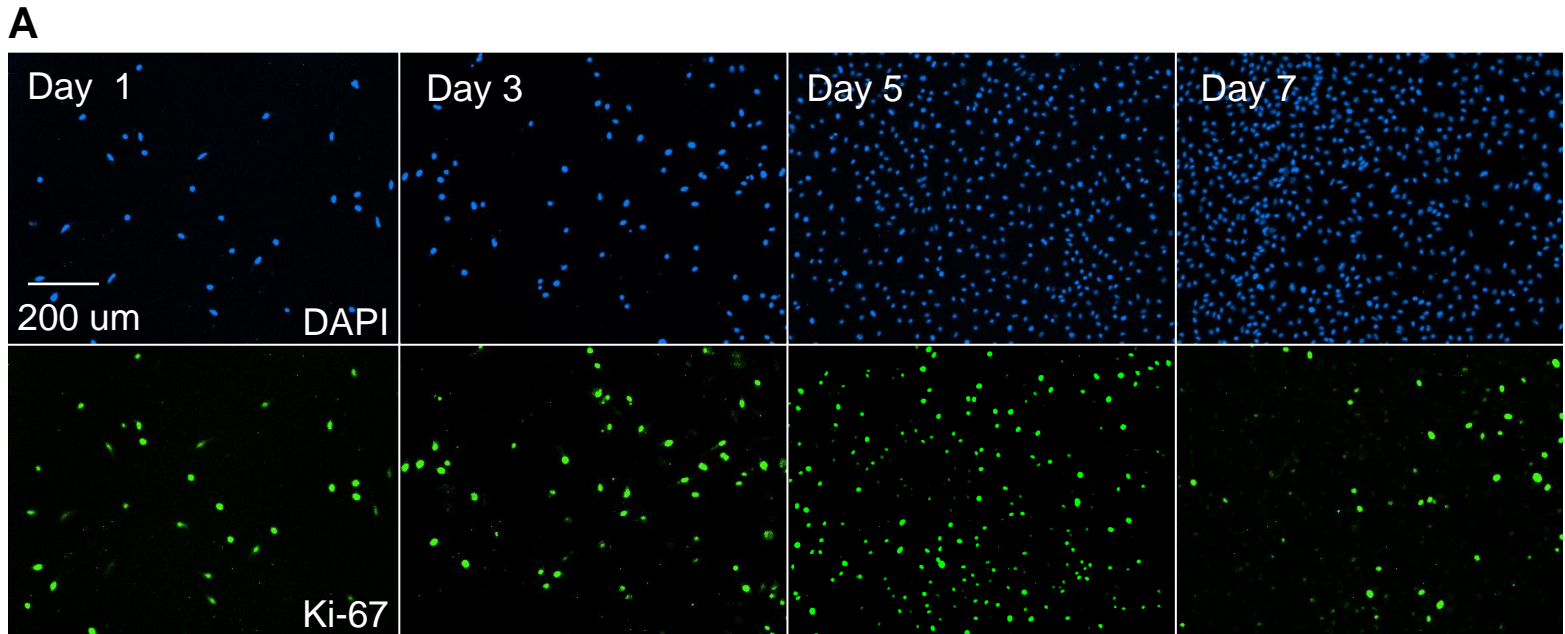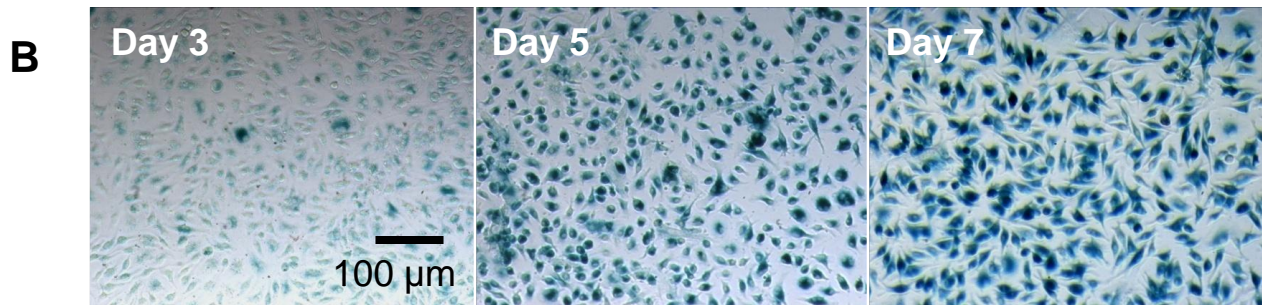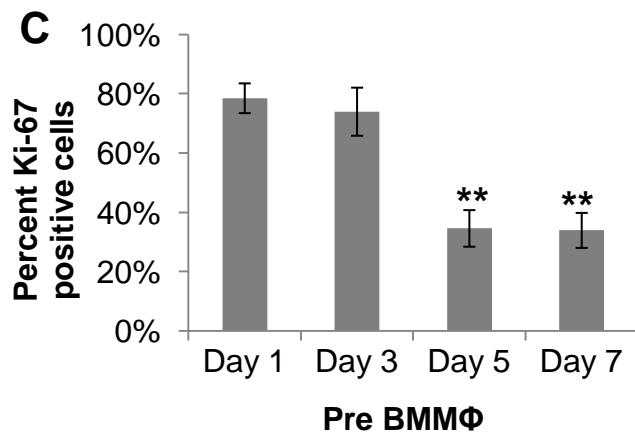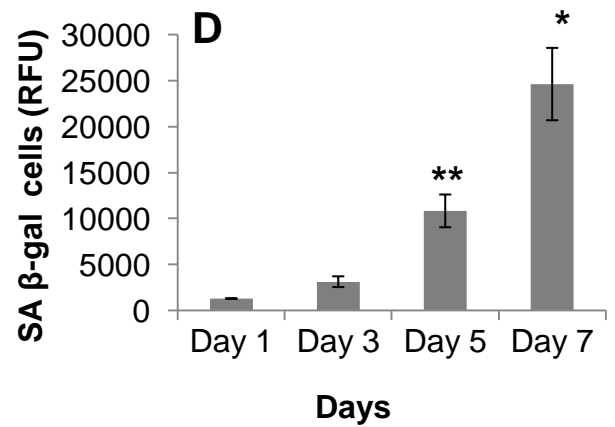

# Supplementary Figure 4

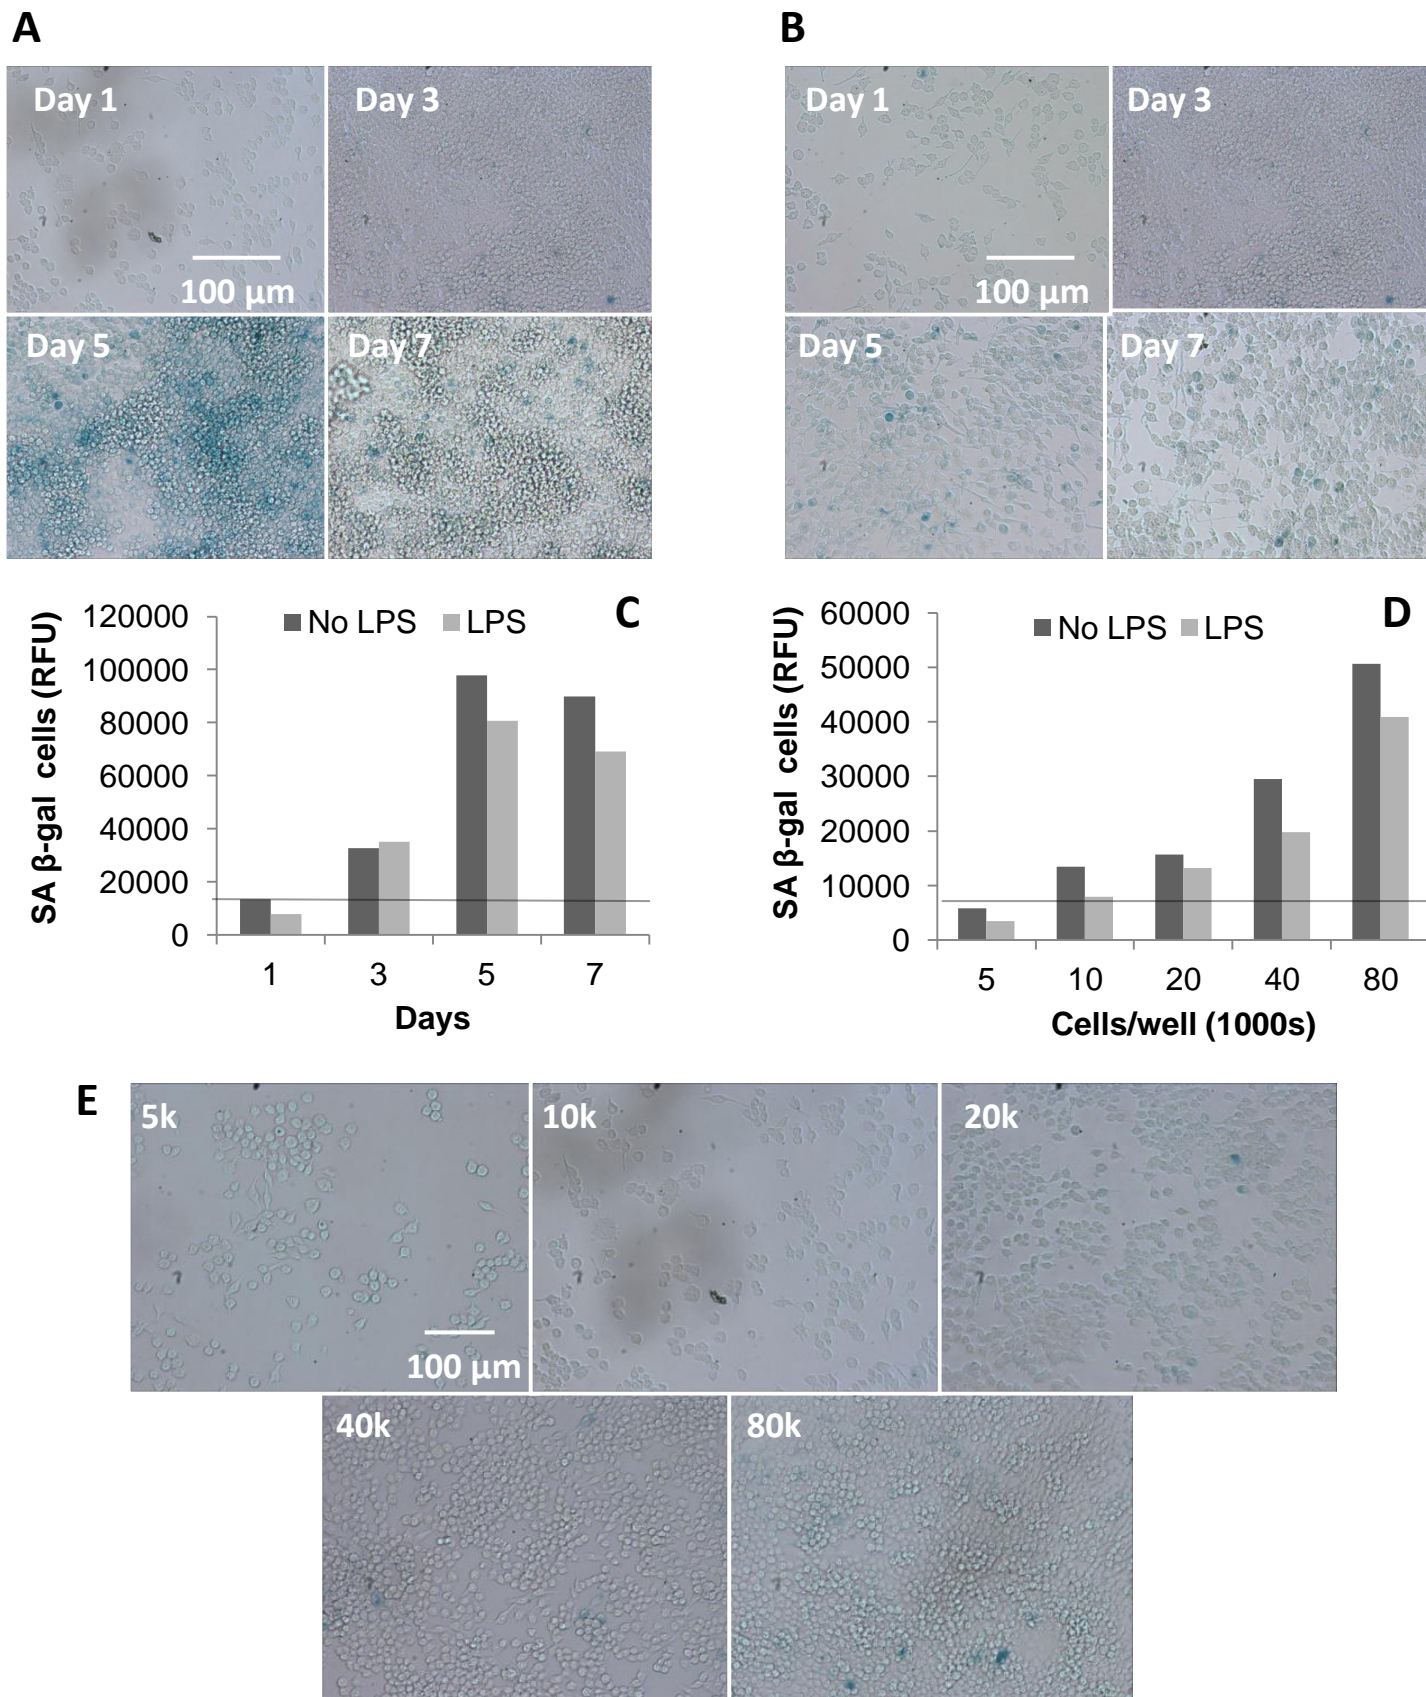

# Supplementary Figure 5

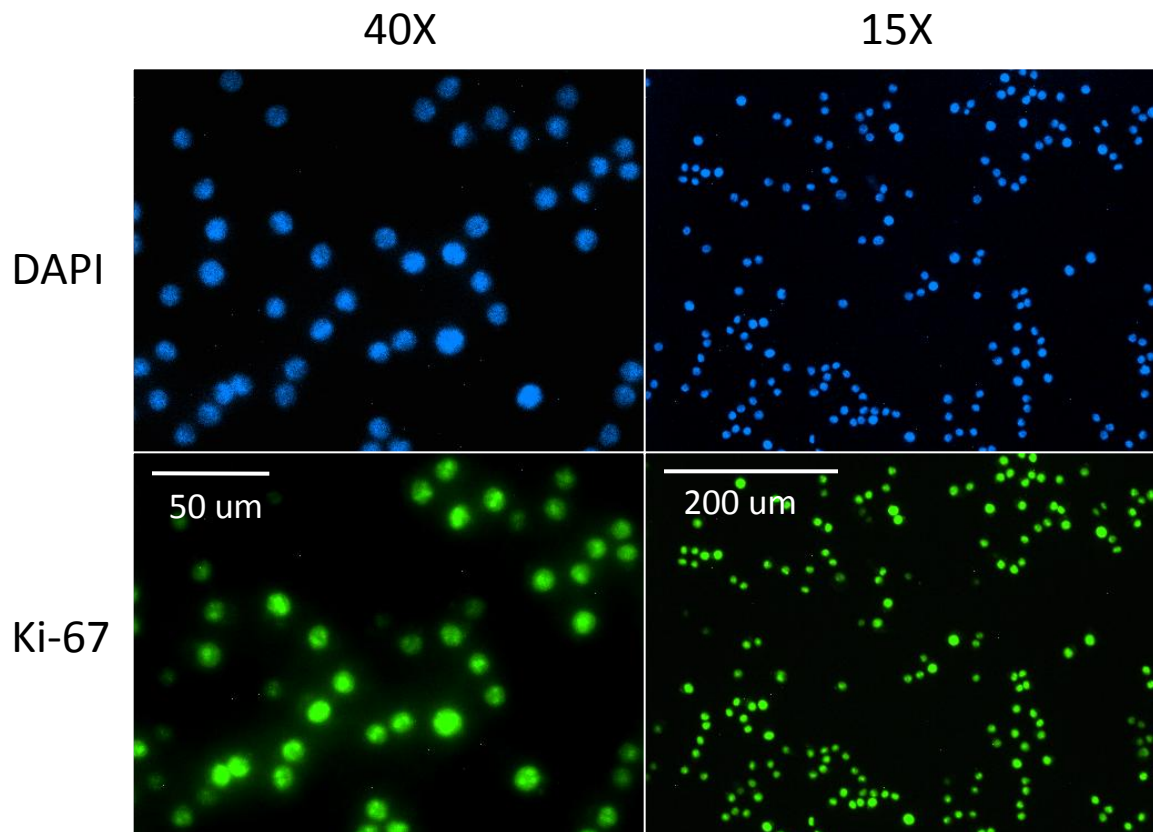

Supplement: NIHMS395809-supplement-01.pdf [file NIHMS395809-supplement-01.pdf]
